# Supplementary material for: Discovery of A Novel Series of Quinazoline–Thiazole Hybrids as Potential Antiproliferative and Anti-Angiogenic Agents
Source: MDPI journal article supplement (doi:10.3390/biom14020218), 2024-02-12
Supplement: s1 [file s1]

## Supplementary Material

## 1. Figures

## 1.1 IR spectrum

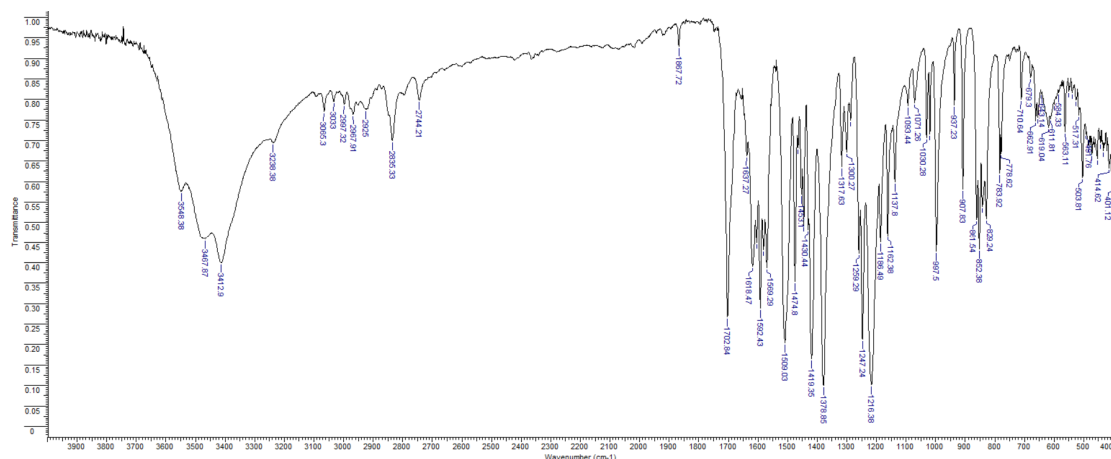

Figure S1. The IR spectrum of intermediate (1)

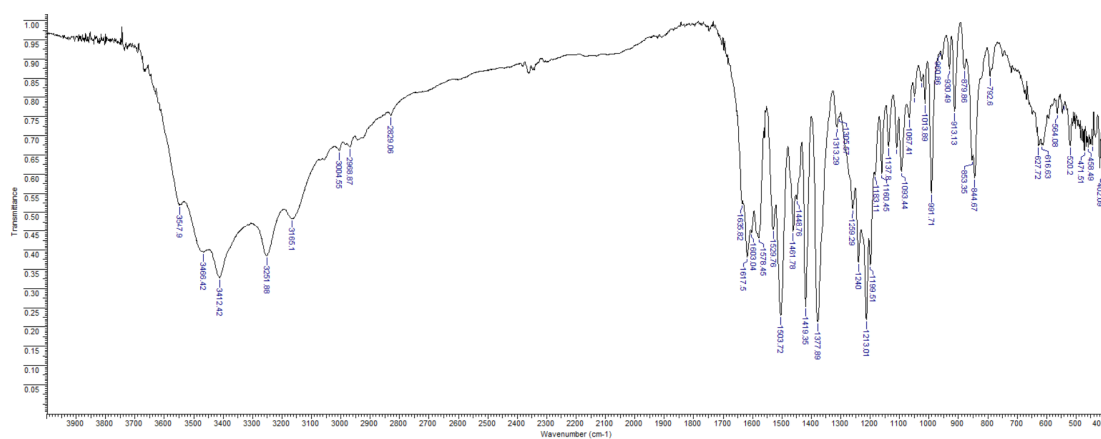

Figure S2. The IR spectrum of intermediate (2)

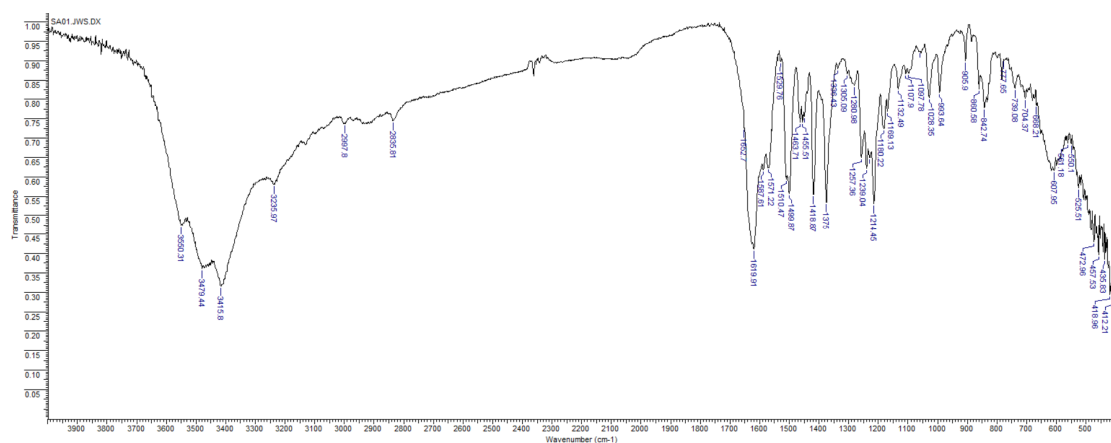

**Figure S3. The IR spectrum of Compound SA01**

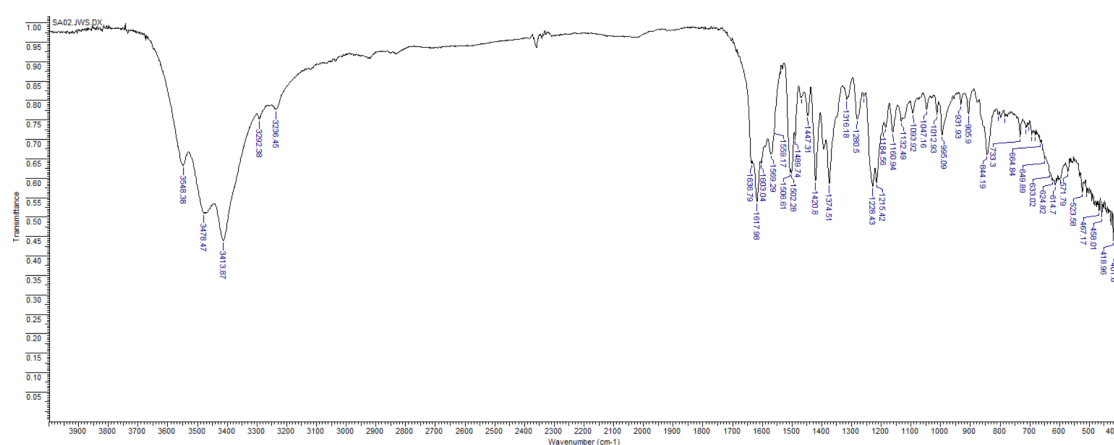

**Figure S4. The IR spectrum of Compound SA02**

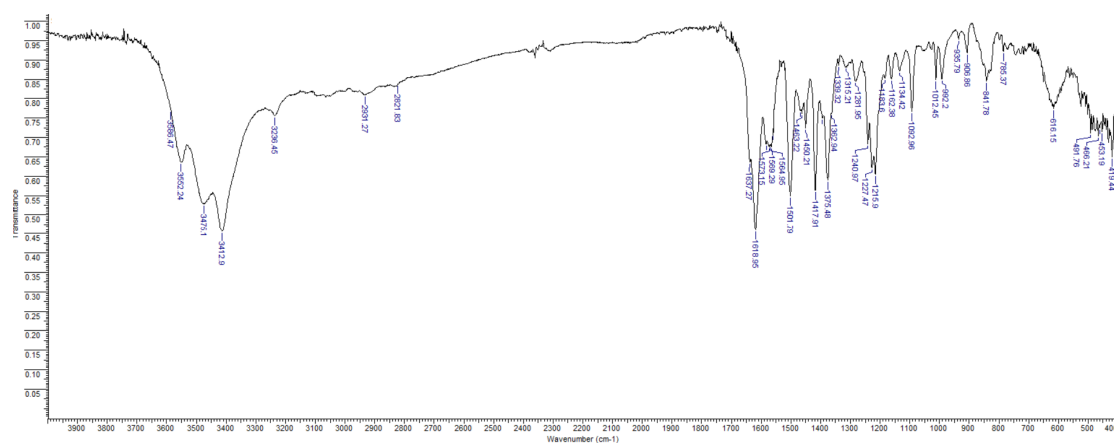

**Figure S5. The IR spectrum of Compound SA03**

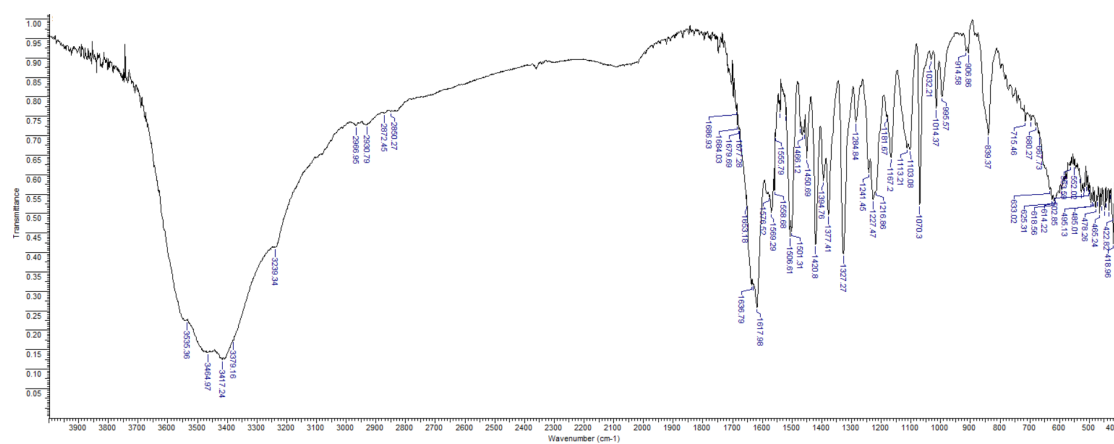

**Figure S6. The IR spectrum of Compound SA04**

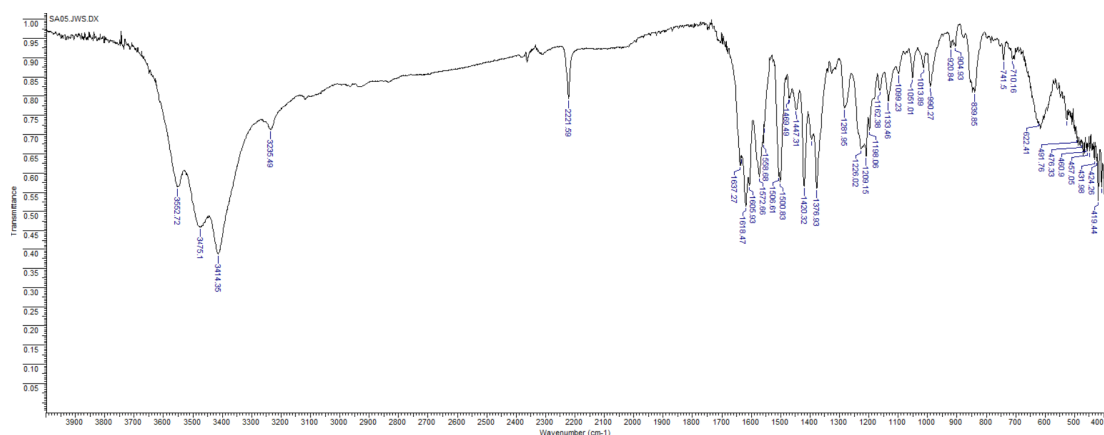

**Figure S7.** The IR spectrum of Compound SA05

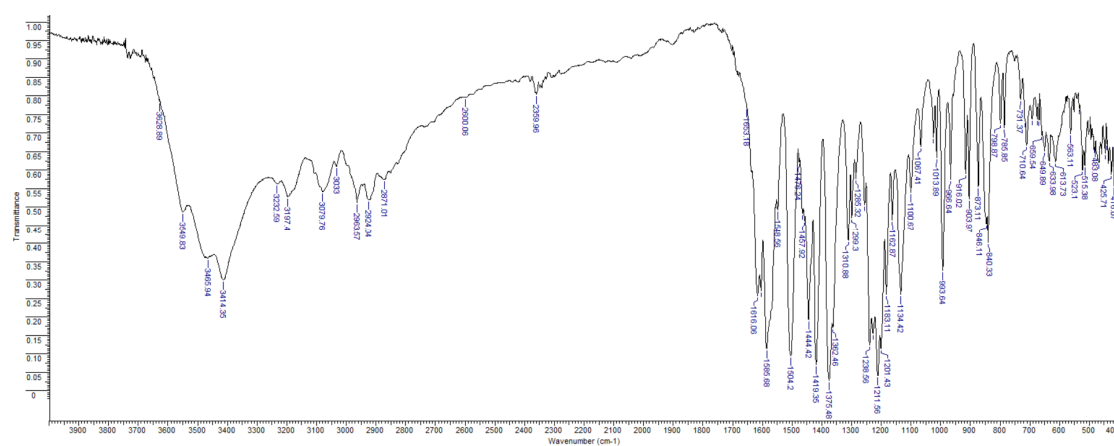

**Figure S8.** The IR spectrum of Compound SA06

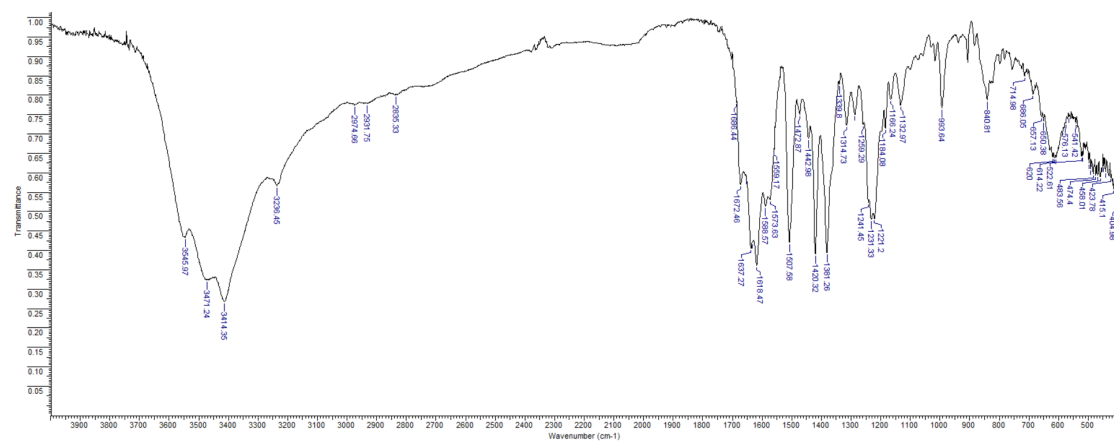

**Figure S9.** The IR spectrum of Compound SA07

## 1.2. The MS spectra

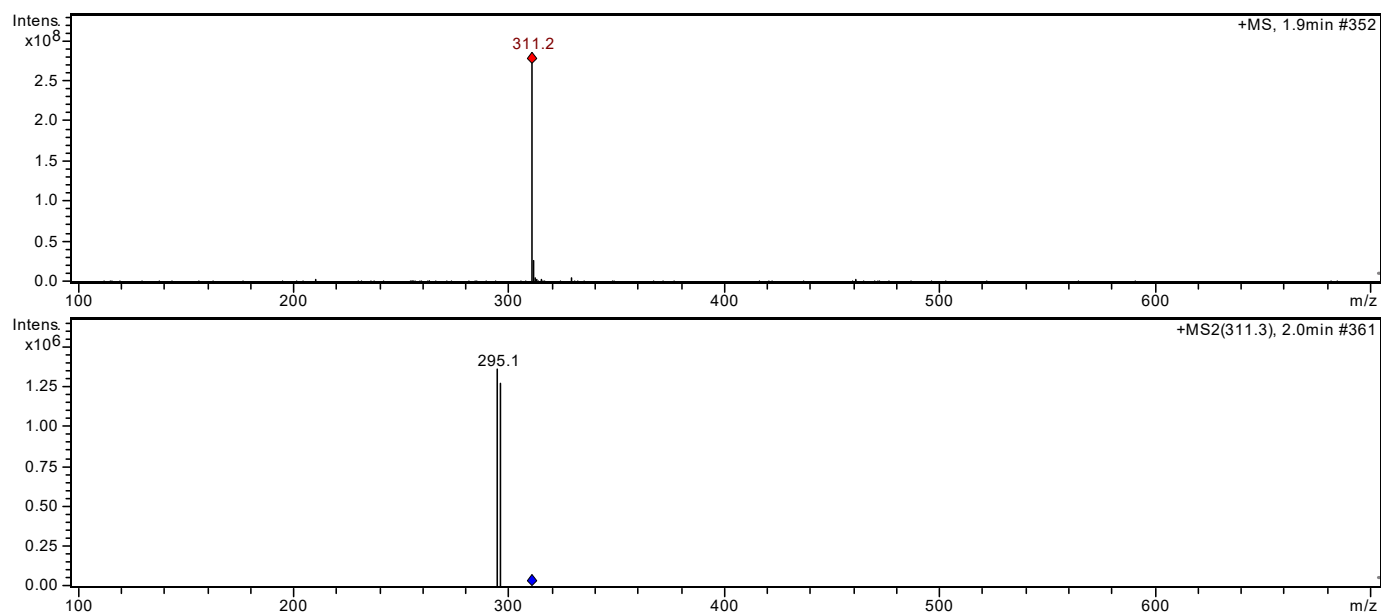

Figure S10. The MS spectra of intermediate (1)

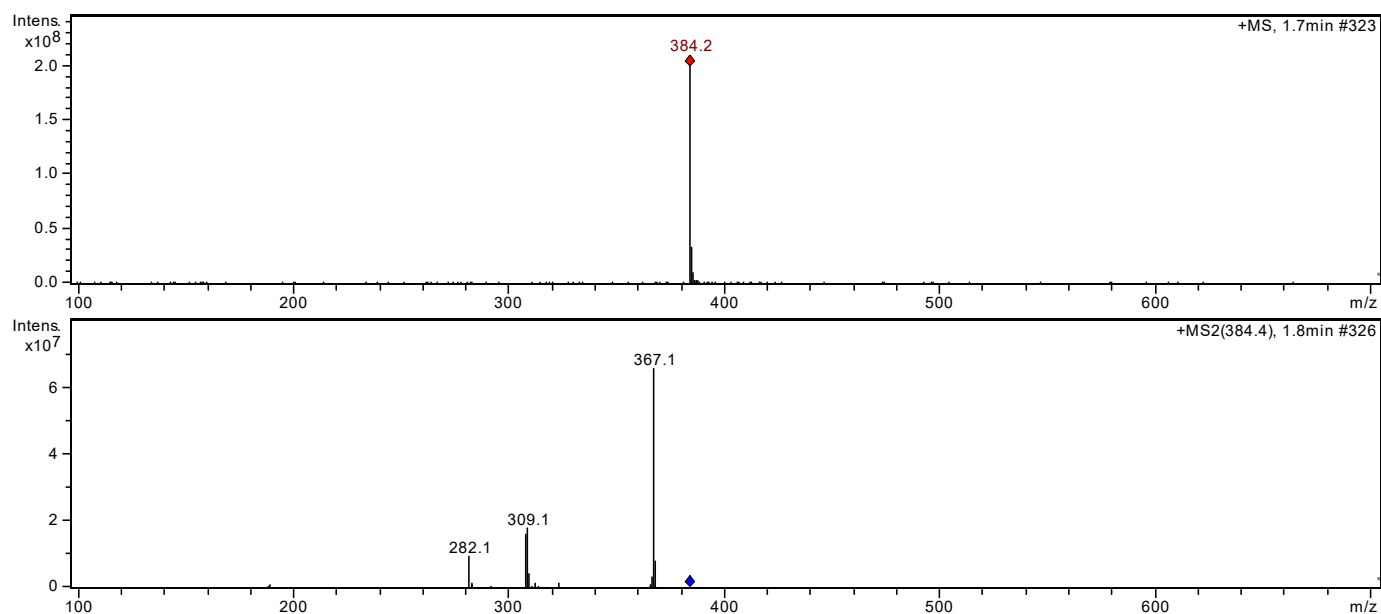

Figure S11. The MS spectra of intermediate (2)

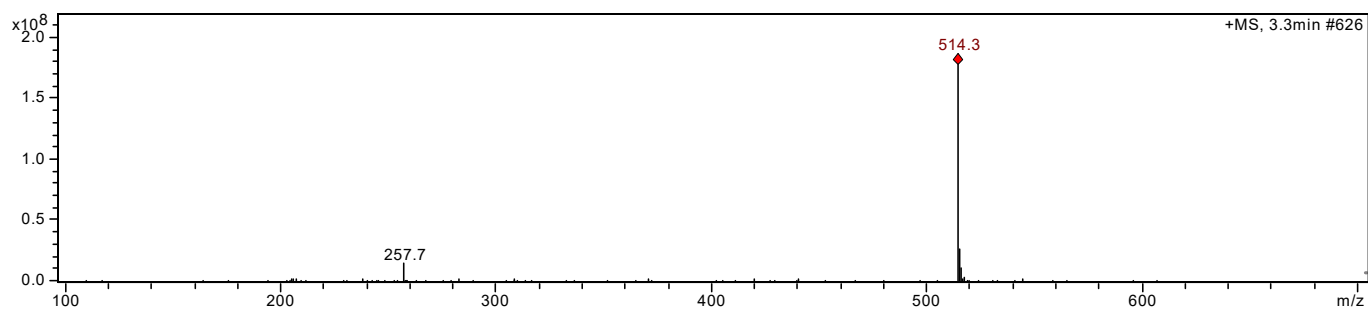

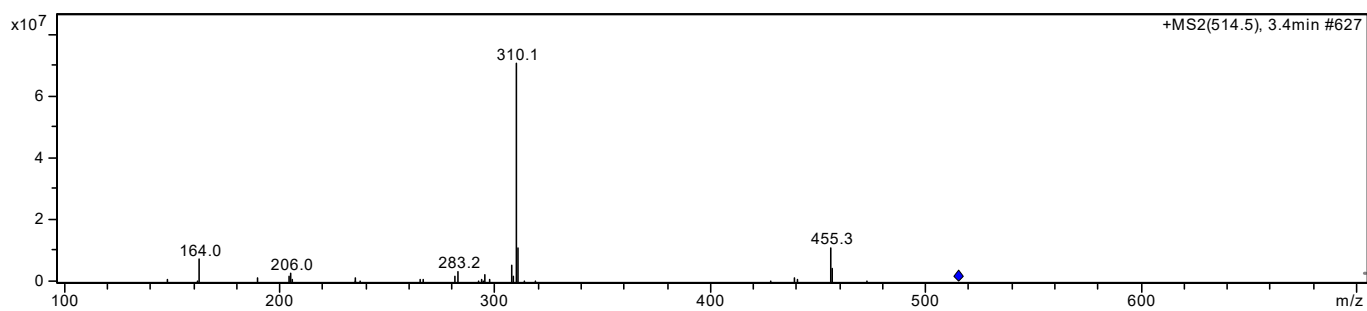

Figure S12. The MS spectra of Compound SA01

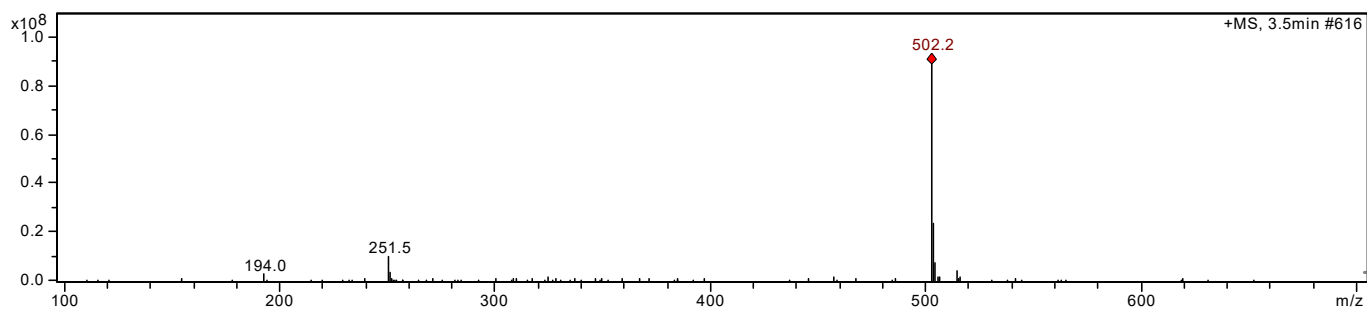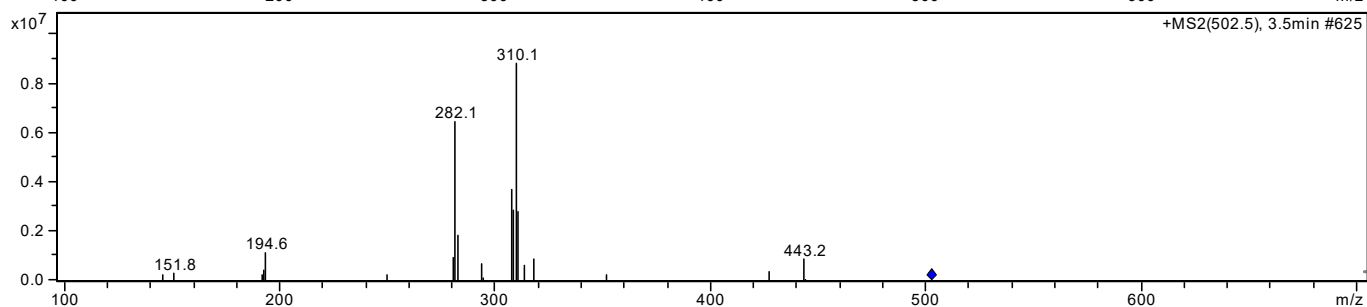

Figure S13. The MS spectra of Compound SA02

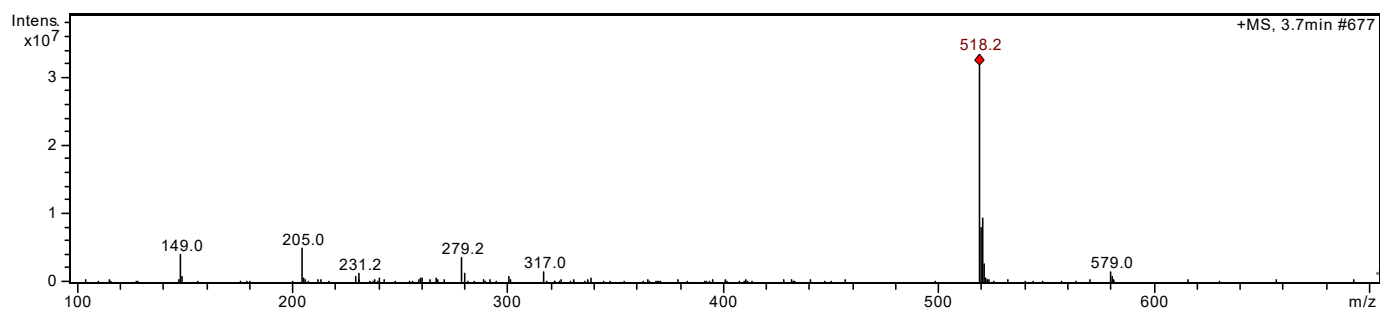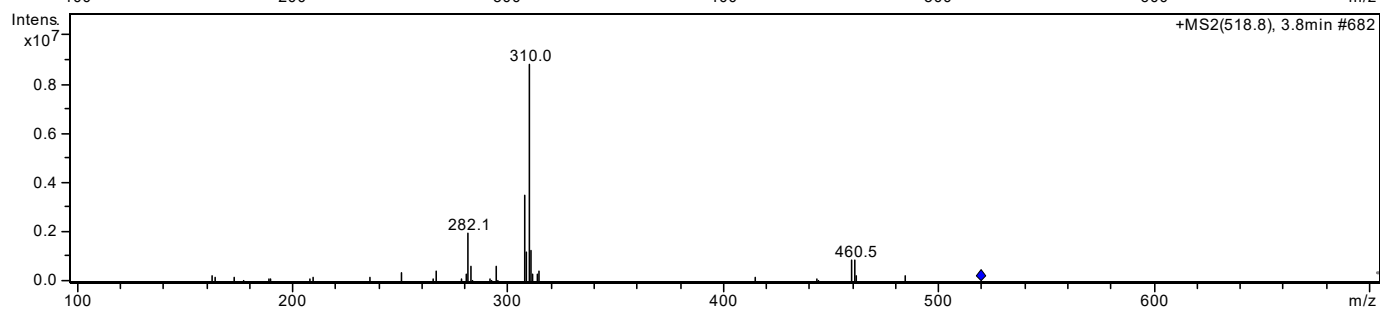

Figure S14. The MS spectra of Compound SA03

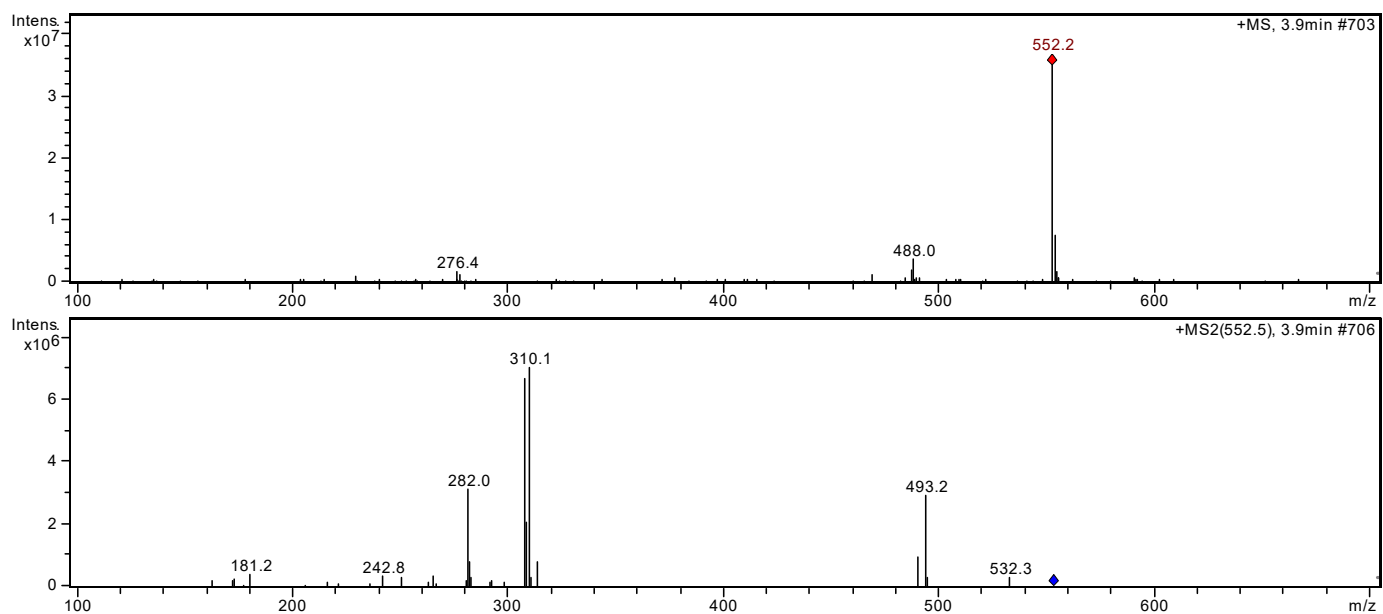

Figure S15. The MS spectra of Compound SA04

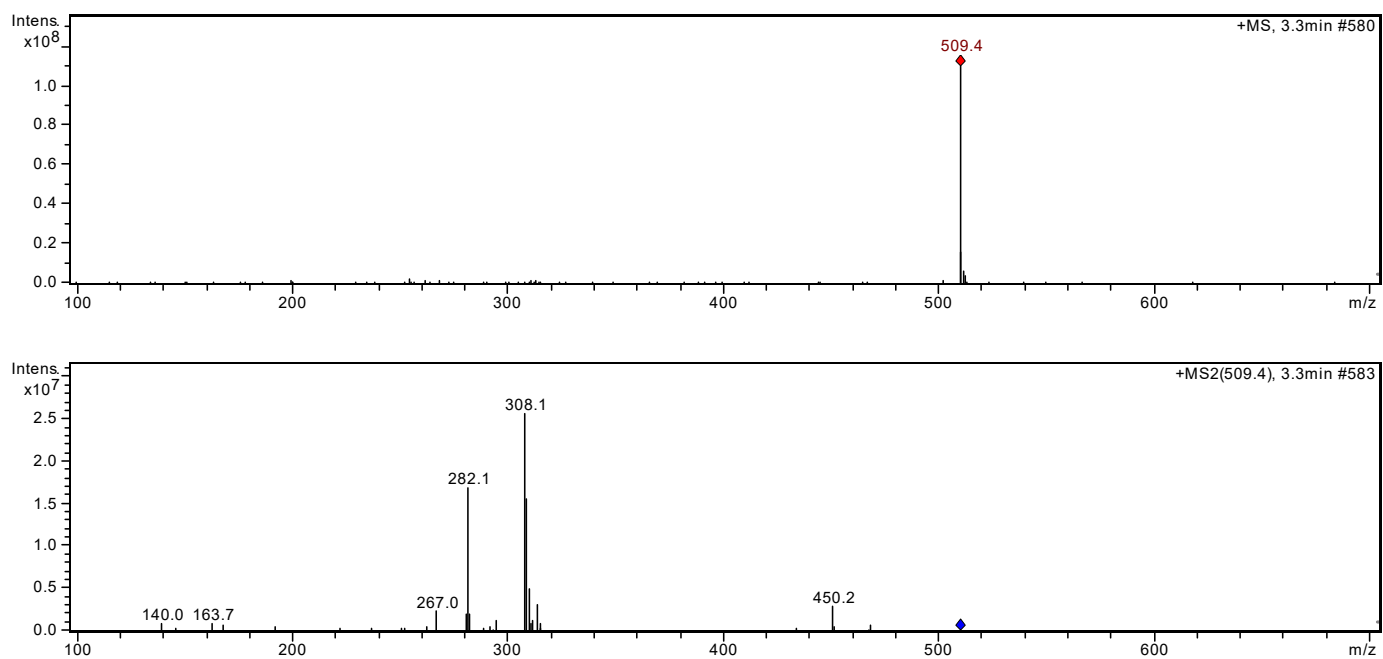

Figure S16. The MS spectra of Compound SA05

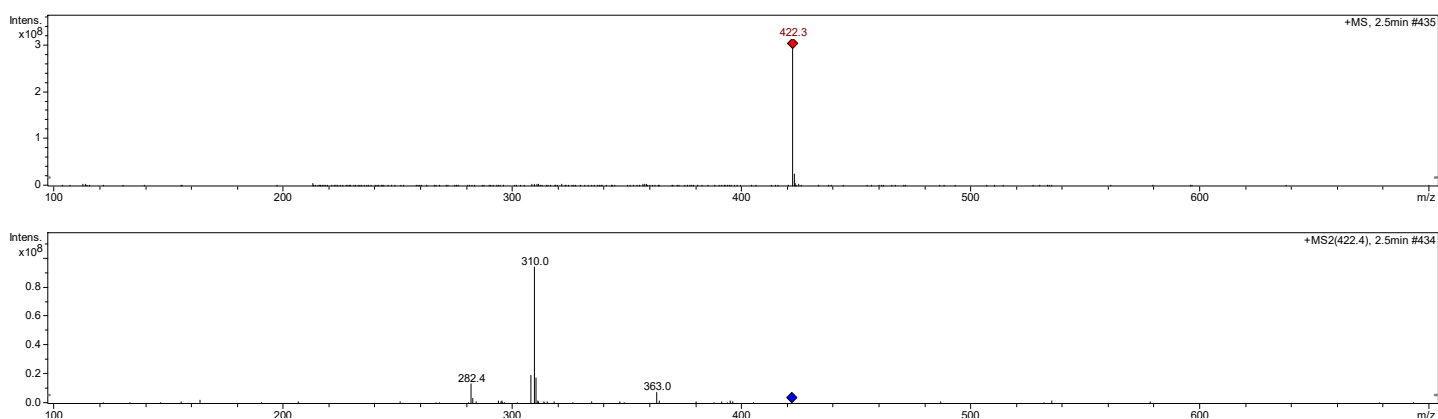

**Figure S17.** The MS spectra of Compound SA06

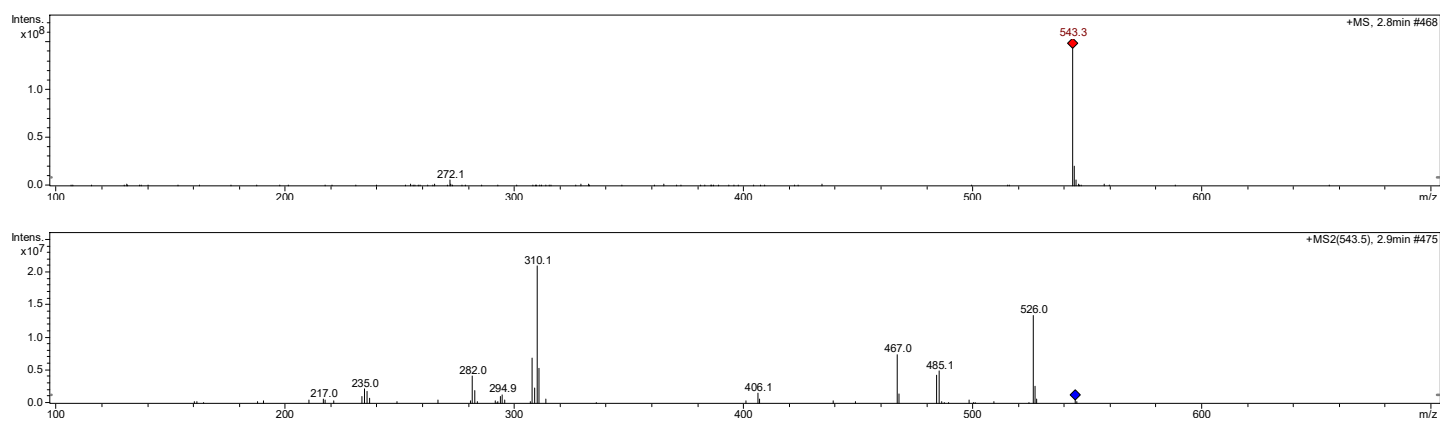

**Figure S18.** The MS spectra of Compound SA07

### 1.3. The <sup>1</sup>H-NMR spectrum

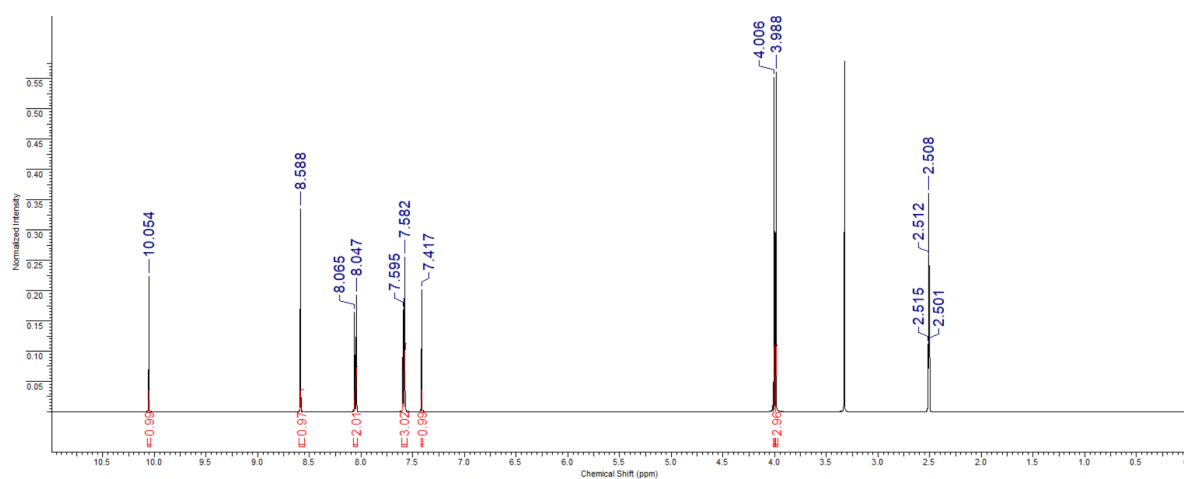

**Figure S19.** The <sup>1</sup>H-NMR spectrum of intermediate (1)

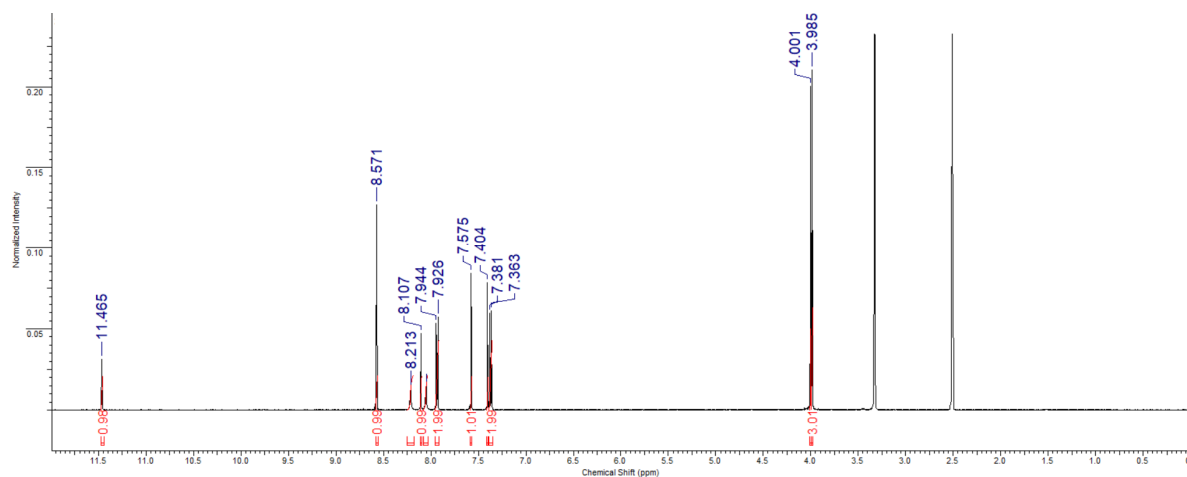

**Figure S20.** The <sup>1</sup>H-NMR spectrum of intermediate (2)

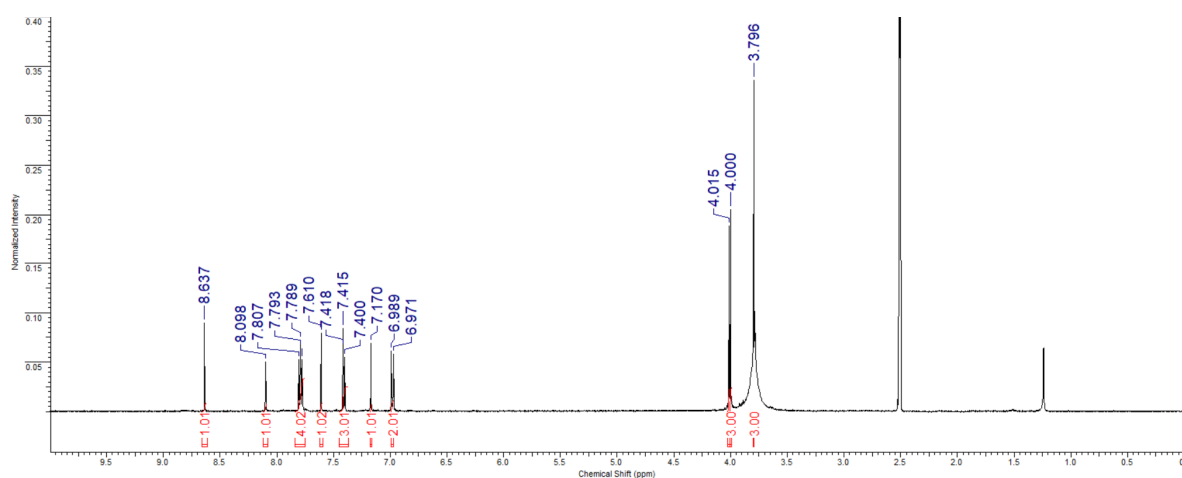

**Figure S21.** The <sup>1</sup>H-NMR spectrum of Compound SA01

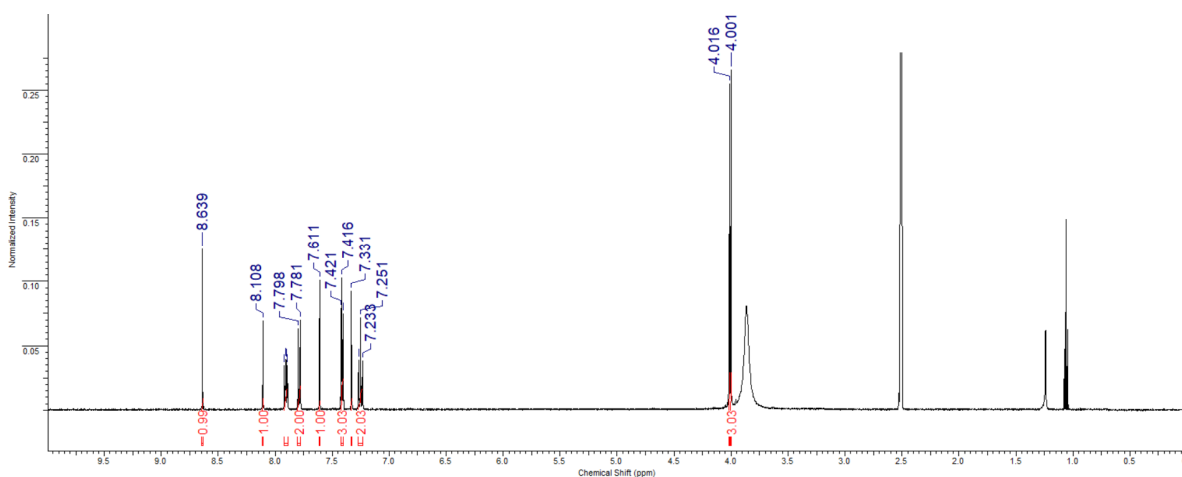

**Figure S22.** The <sup>1</sup>H-NMR spectrum of Compound SA02



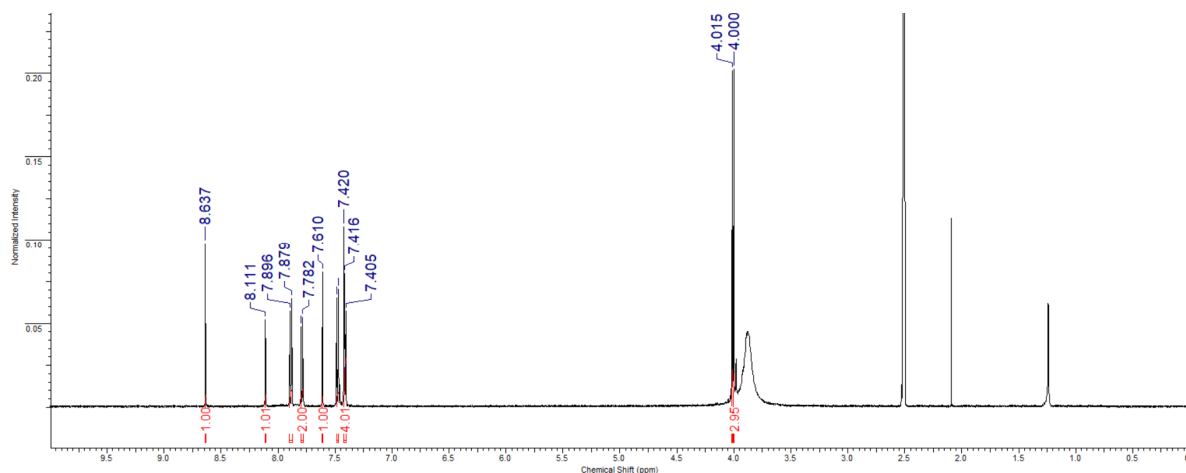

Figure S23. The  $^1\text{H}$ -NMR spectrum of Compound SA03

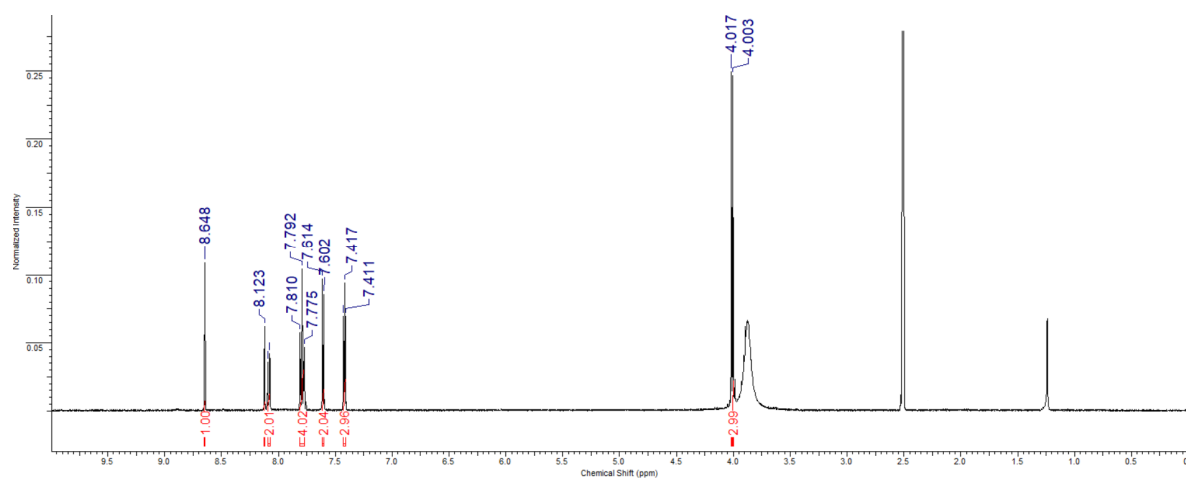

Figure S24. The  $^1\text{H}$ -NMR spectrum of Compound SA04

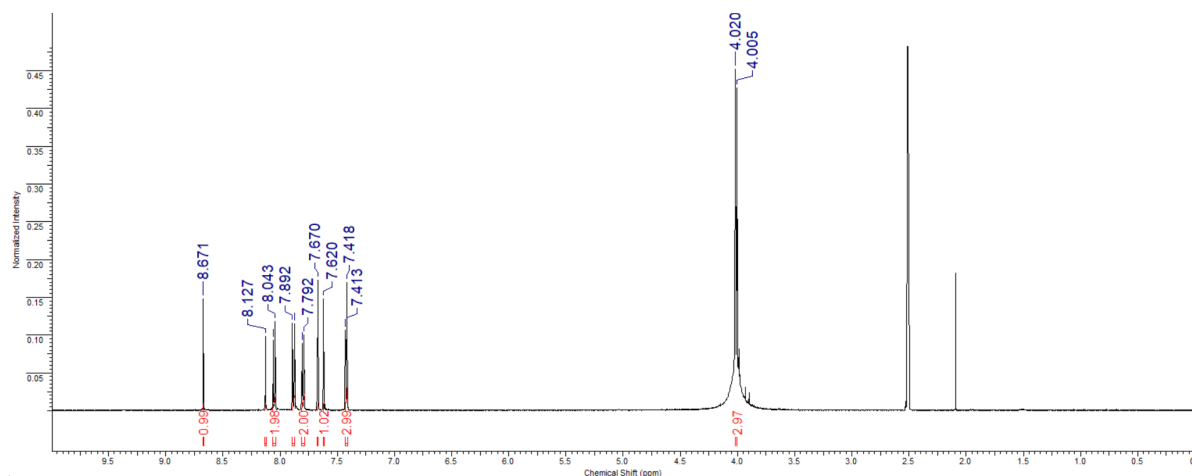

Figure S25. The  $^1\text{H}$ -NMR spectrum of Compound SA05

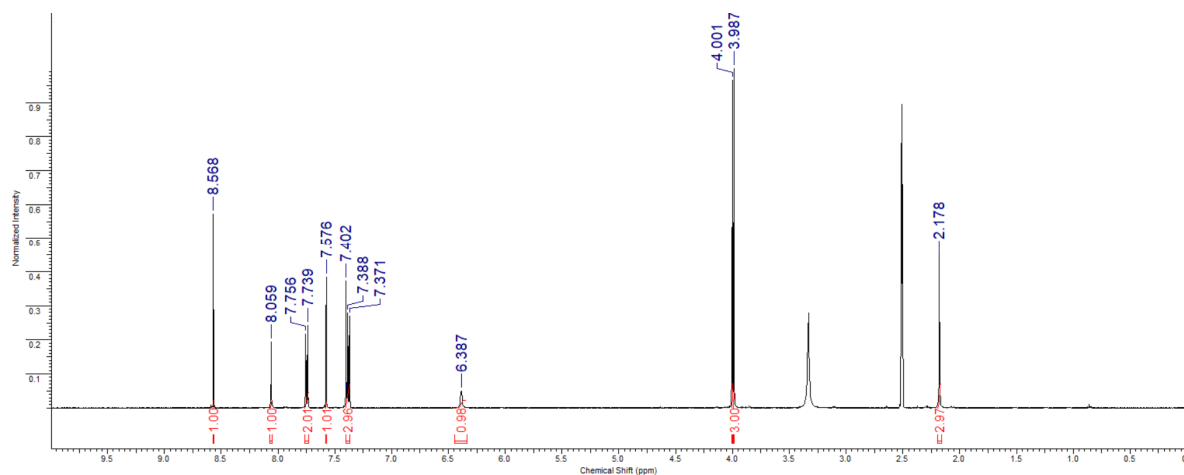

**Figure S26.** The  $^1\text{H}$ -NMR spectrum of Compound SA06

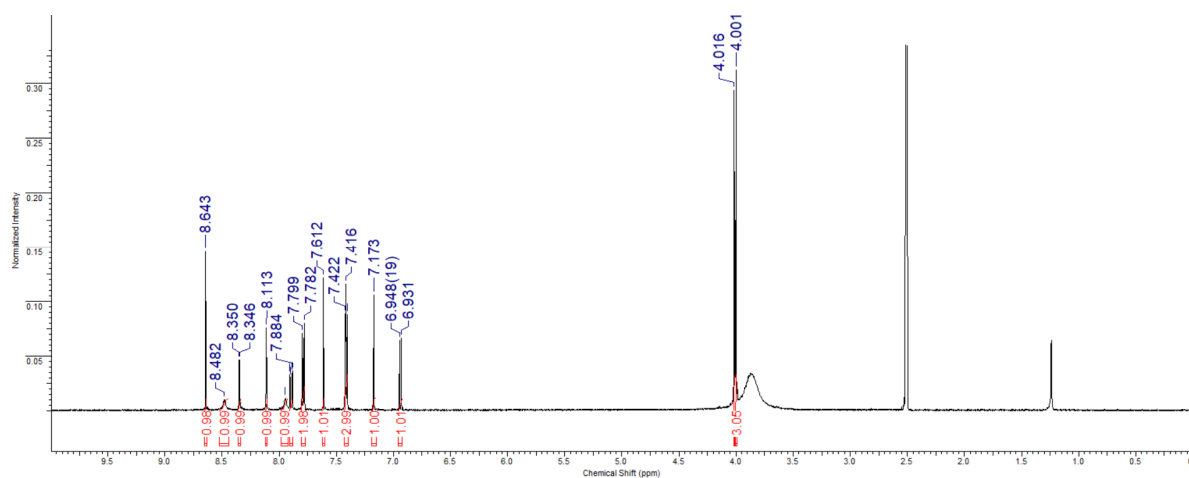

**Figure S27.** The  $^1\text{H}$ -NMR spectrum of Compound SA07

#### 1.4. The $^{13}\text{C}$ -NMR spectra

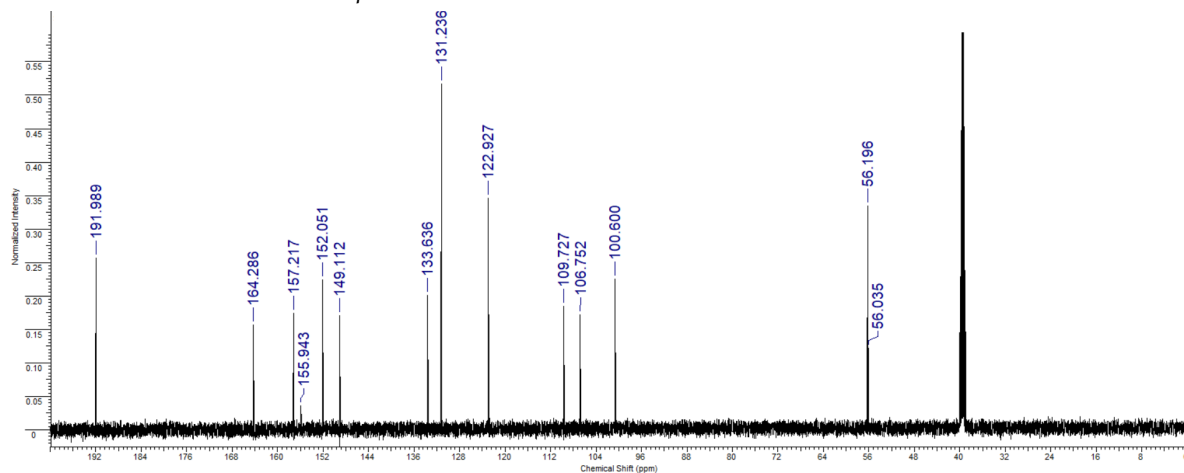

**Figure S28.** The  $^{13}\text{C}$ -NMR spectrum of Intermediate (1)

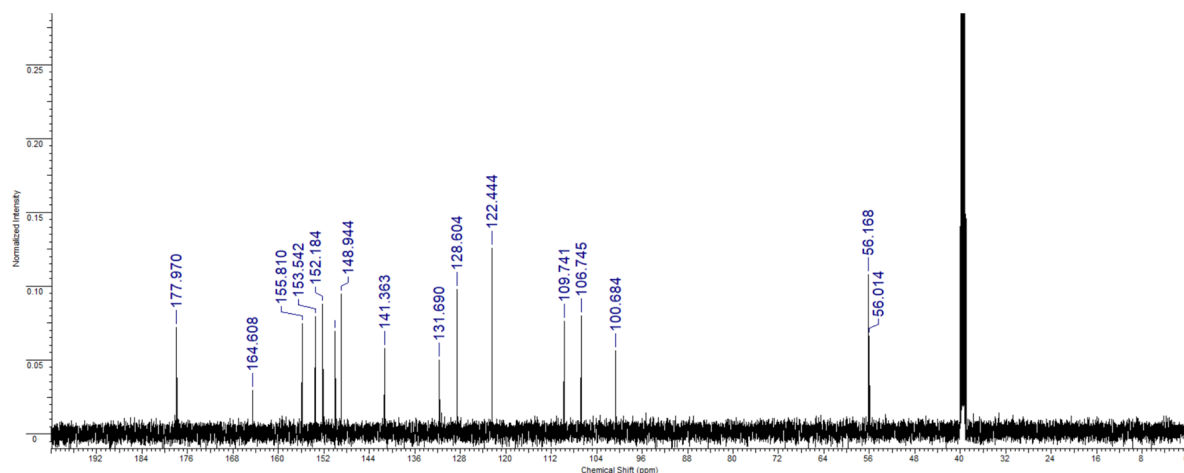

Figure S29. The  $^{13}\text{C}$ -NMR spectrum of Intermediate (2)

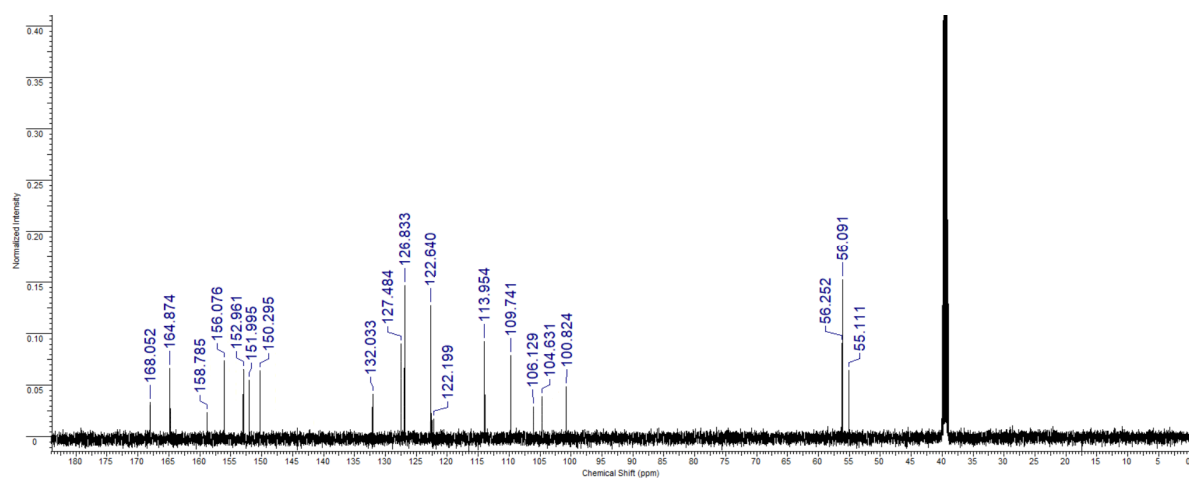

Figure S30. The  $^{13}\text{C}$ -NMR spectrum of Compound SA01

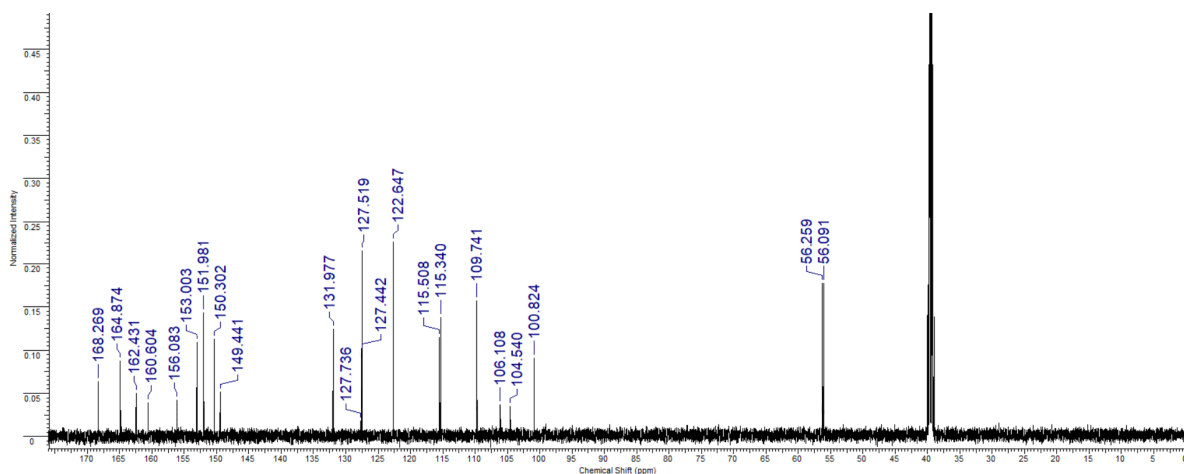

Figure S31. The  $^{13}\text{C}$ -NMR spectrum of Compound SA02

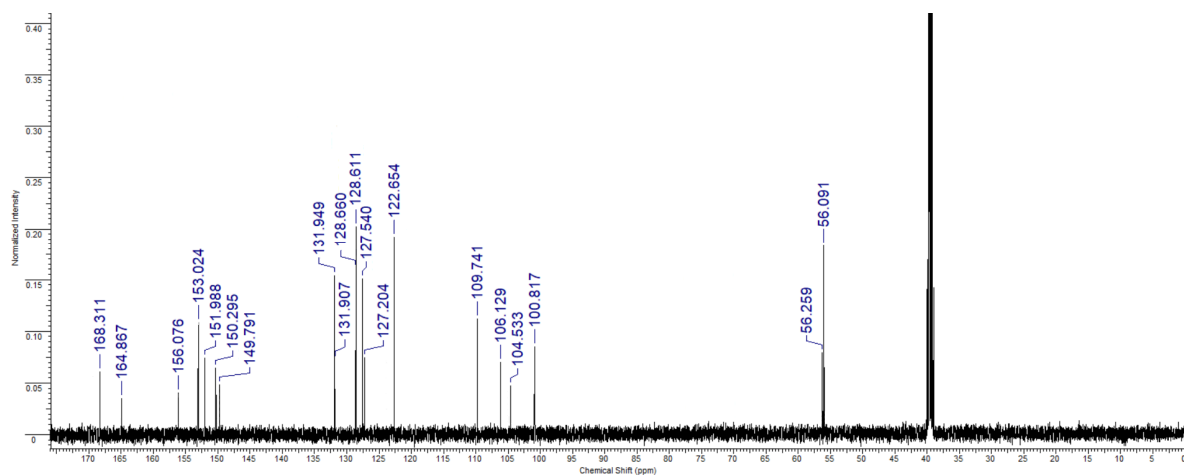

Figure S32. The <sup>13</sup>C-NMR spectrum of Compound SA03

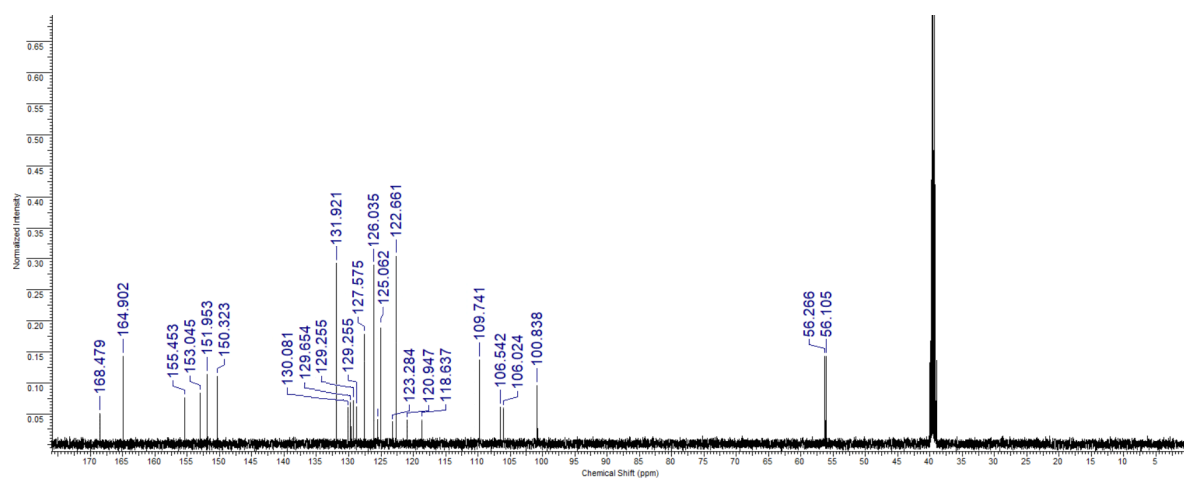

Figure S33. The <sup>13</sup>C-NMR spectrum of Compound SA04

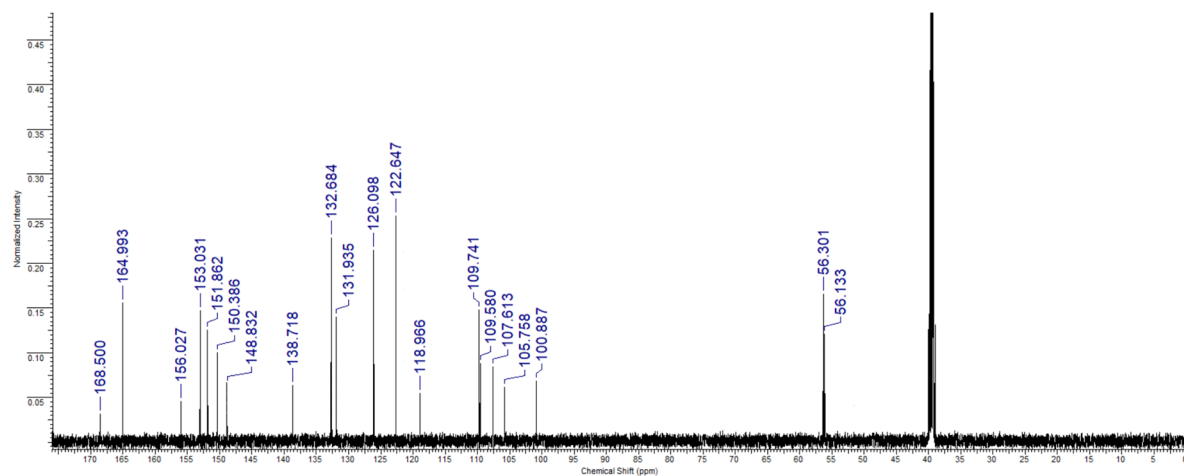

Figure S34. The <sup>13</sup>C-NMR spectrum of Compound SA05

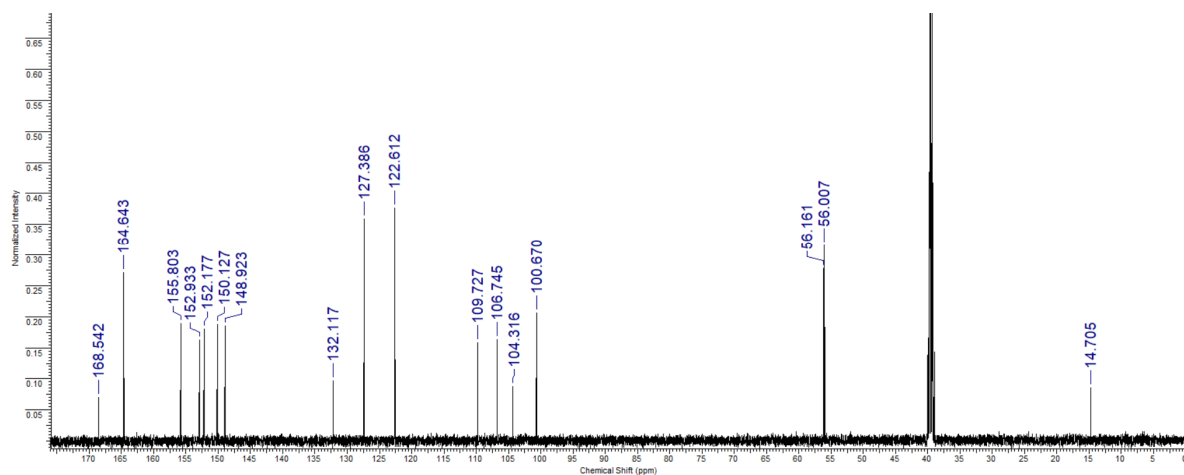

**Figure S35.** The  $^{13}\text{C}$ -NMR spectrum of Compound SA06

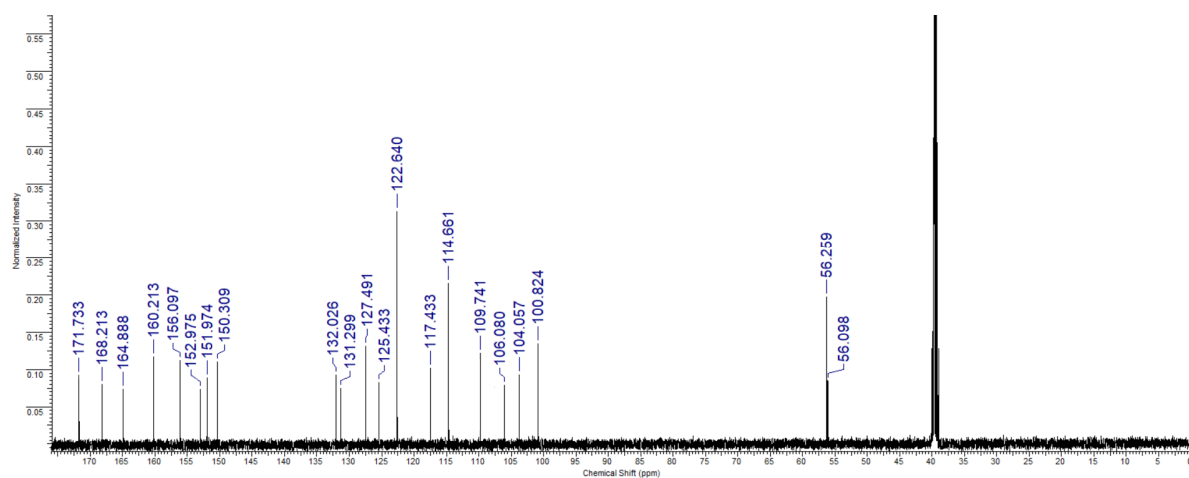

**Figure S36.** The  $^{13}\text{C}$ -NMR spectrum of Compound SA07

### 1.5. *In vitro* cytotoxicity evaluation

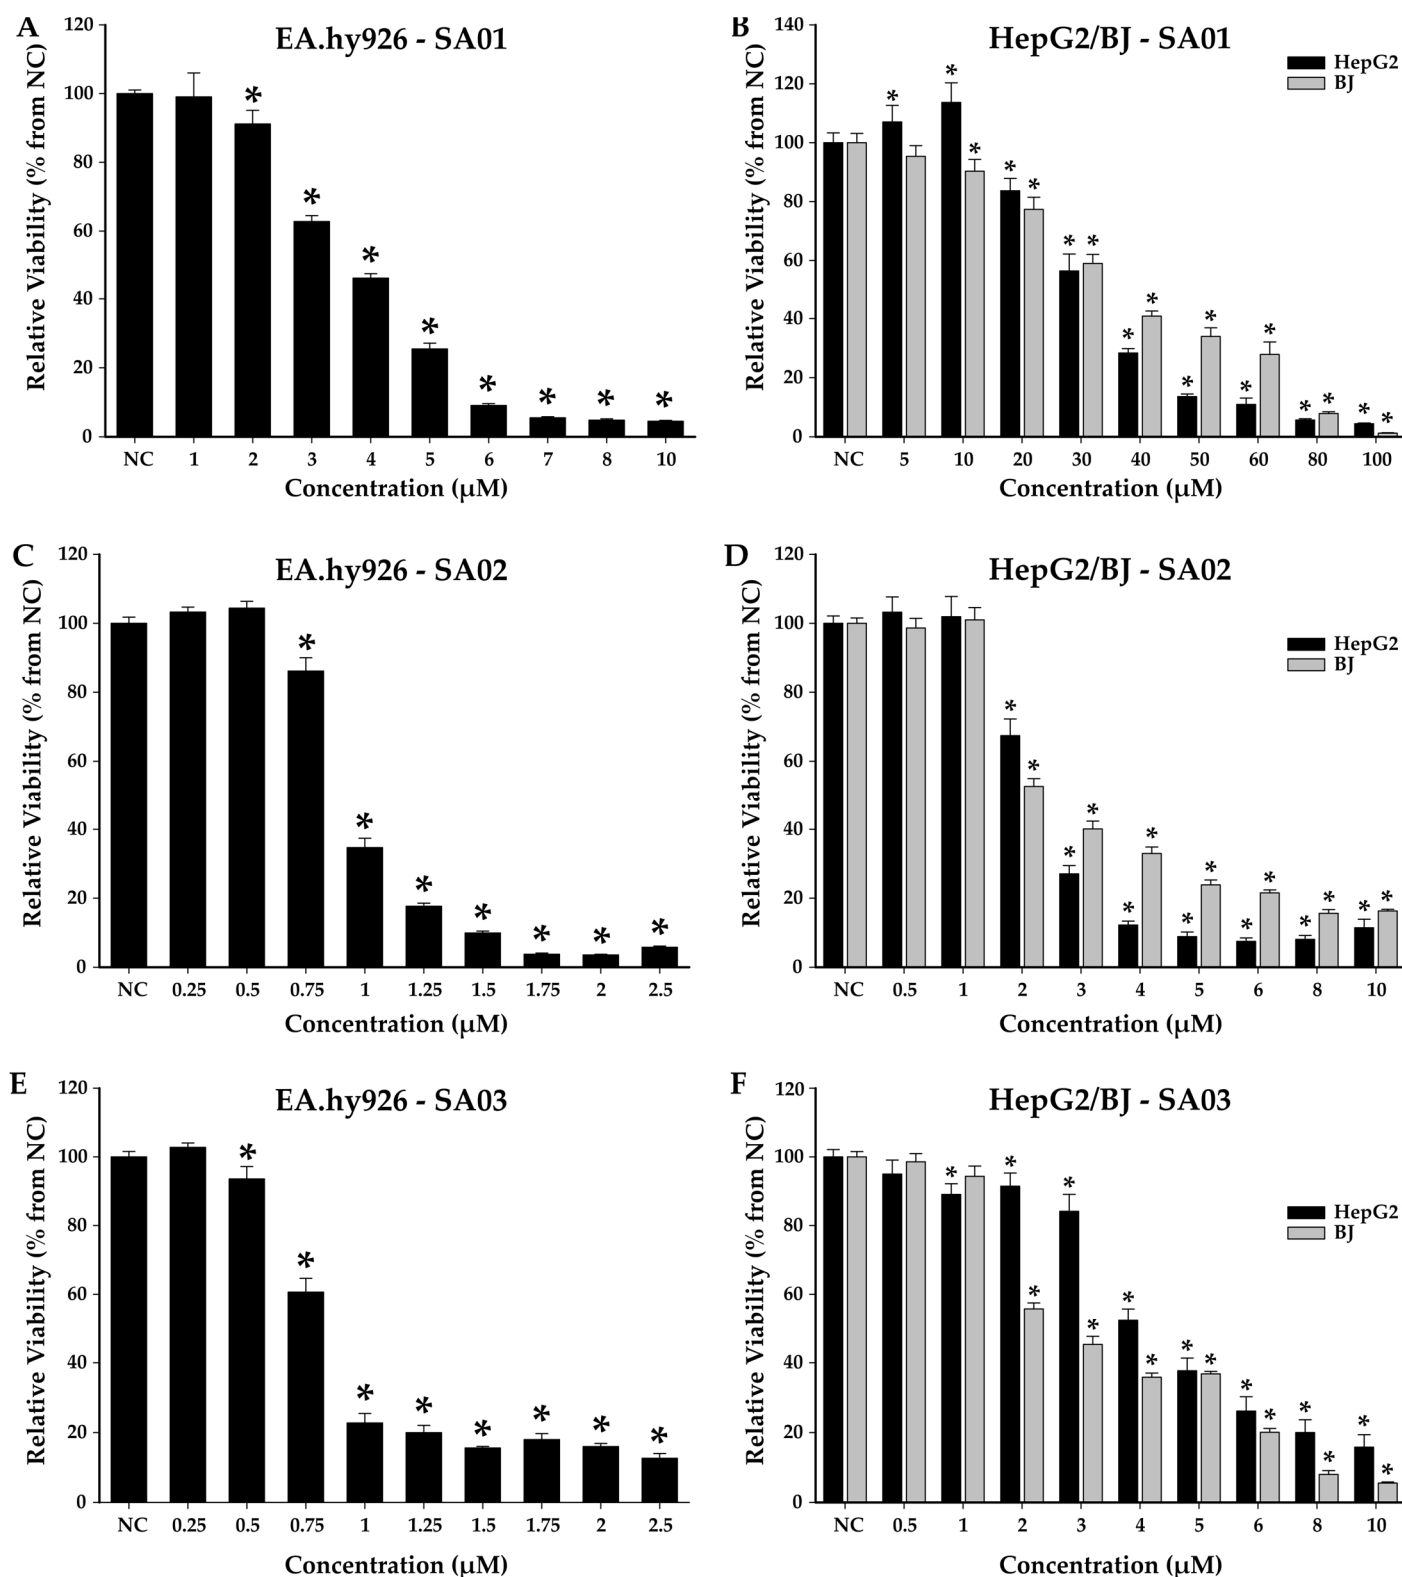

**Figure S37.** Cytotoxic effect of SA01 (A, B), SA02 (C, D) and SA03 (E, F) after a 48 h exposure of EA.hy926, HepG2 and BJ cells. The results are expressed as relative means  $\pm$  standard deviations of three biological replicates. Data were expressed as relative values compared to the negative control (NC)(100%). Asterisks (\*) indicate significant differences ( $p < 0.05$ ) compared to NC.

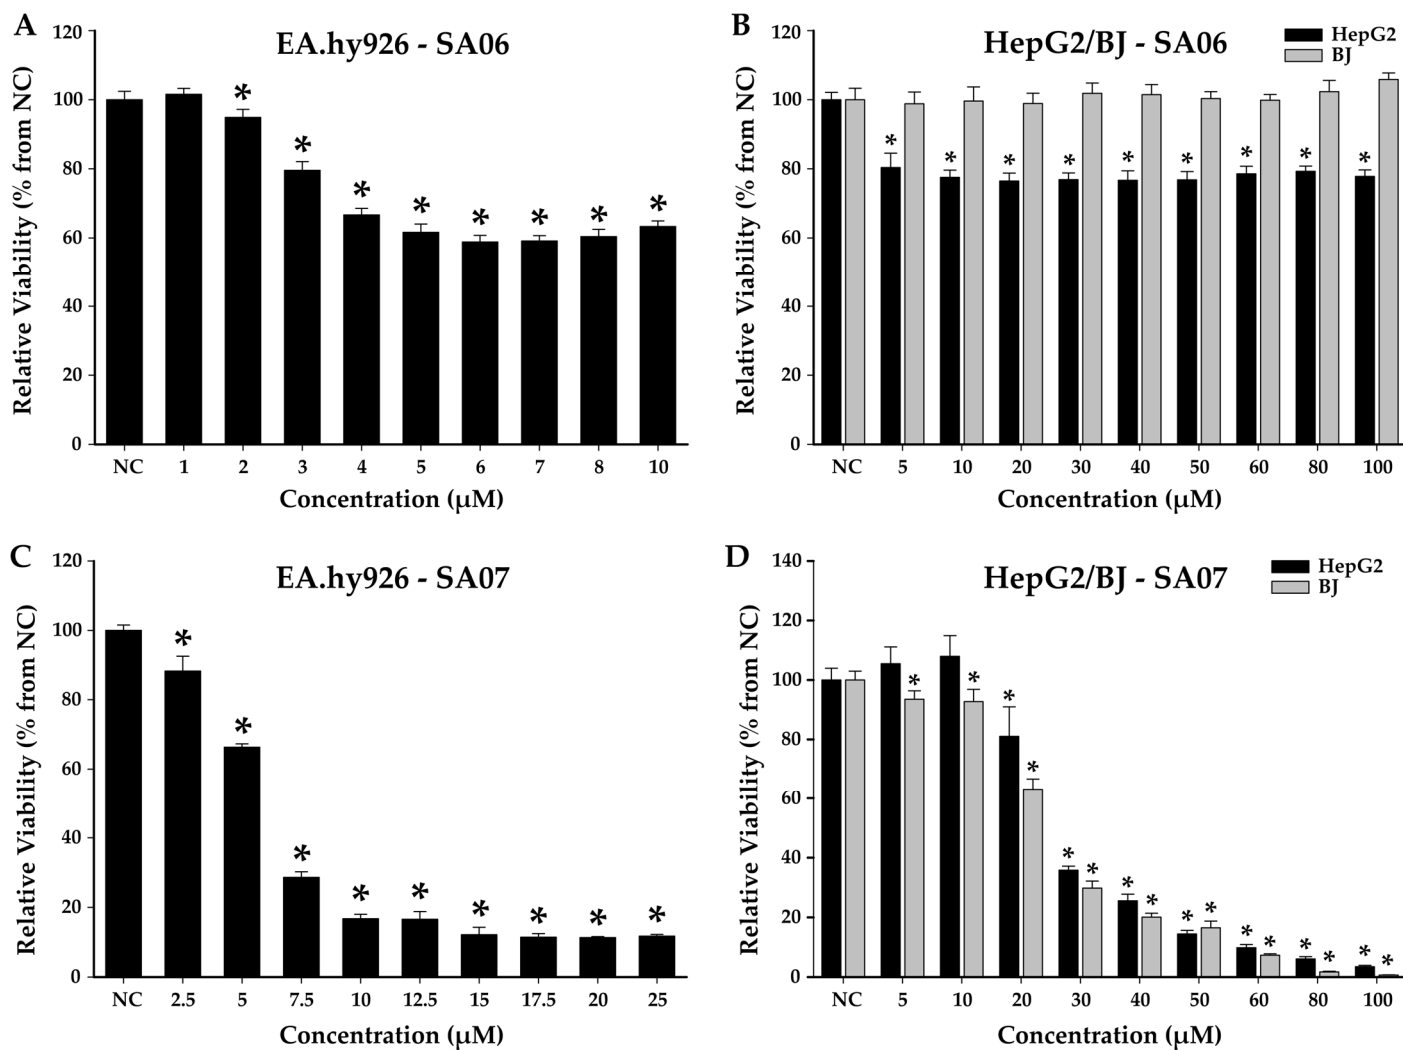

**Figure S38.** Cytotoxic effect of SA06 (A,B) and SA07 (C,D) after a 48 h exposure of EA.hy926, HepG2 and BJ cells. The results are expressed as relative means  $\pm$  standard deviations of three biological replicates. Data were expressed as relative values compared to the negative control (NC)(100%). Asterisks (\*) indicate significant differences ( $p < 0.05$ ) compared to NC.

### 1.6. Molecular Dynamics studies

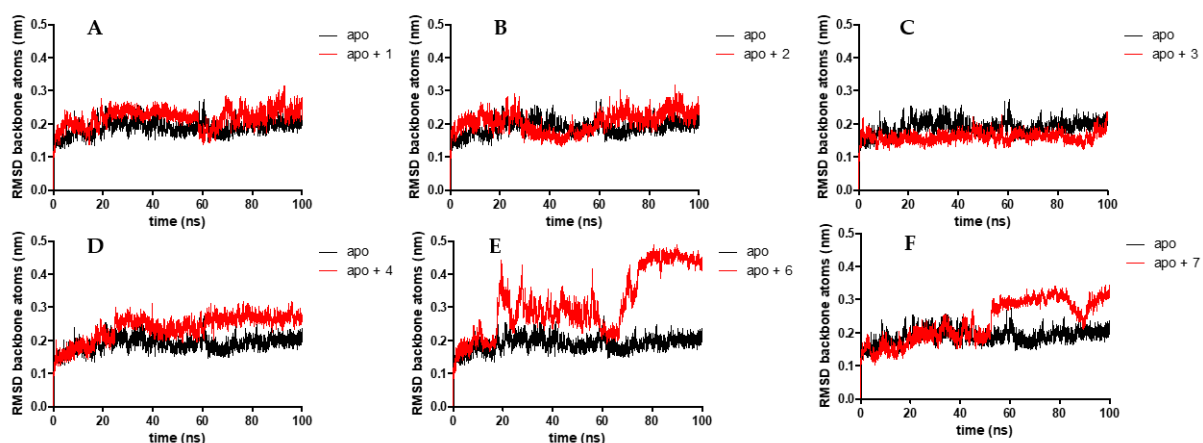

**Figure S39.** Graphical representation of Root means square deviation (RMSD) of the heavy atoms of VEGFR2 during the 100 ns simulation for SA01 (A); SA02 (B); SA03 (C); SA04 (D); SA06 (E); SA07 (F);

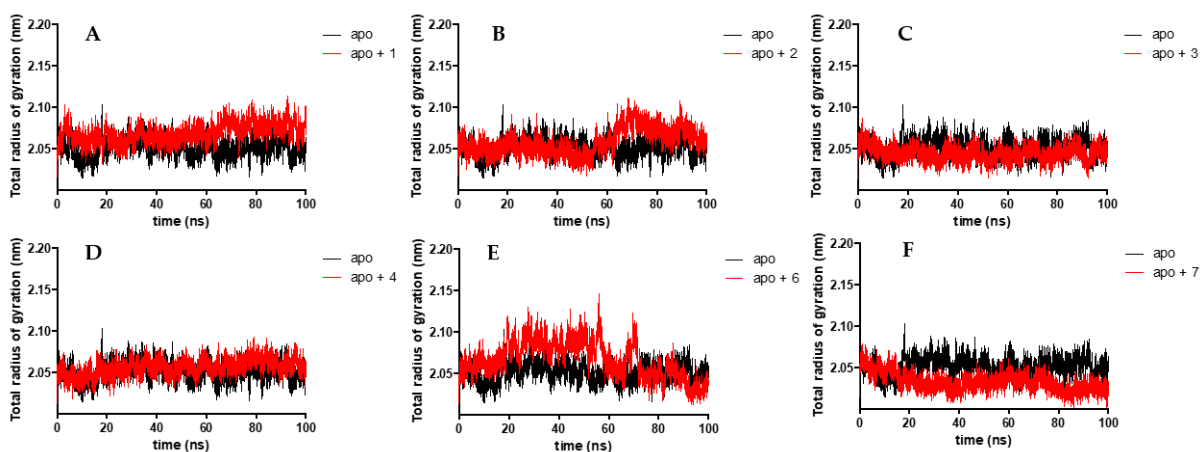

**Figure S40.** Graphical representation of the radius of gyration during the 100 ns simulation for SA01 (A); SA02 (B); SA03 (C); SA04 (D); SA06 (E); SA07 (F);

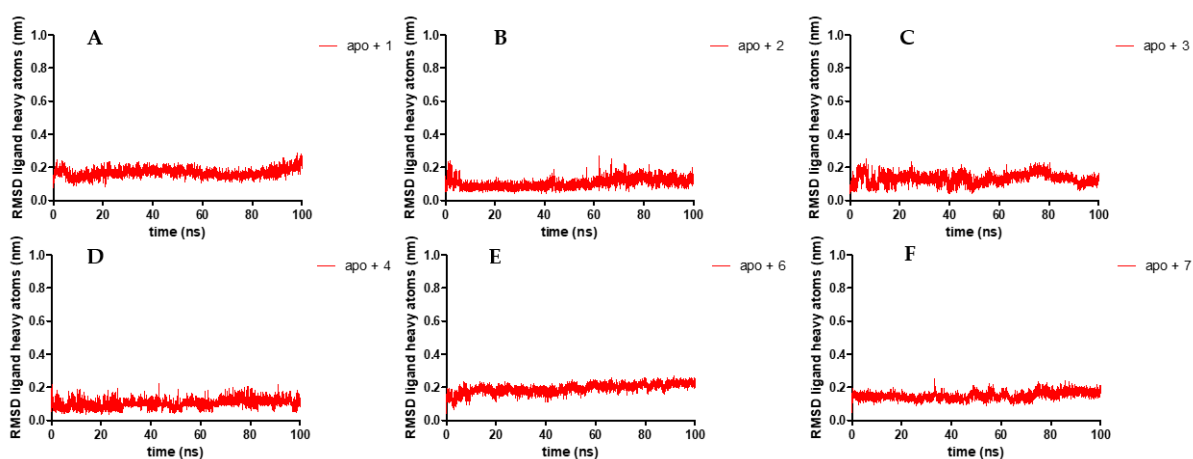

**Figure S41.** RMSD of ligand's heavy atoms during the 100 ns simulation for SA01 (A); SA02 (B); SA03 (C); SA04 (D); SA06 (E); SA07 (F);



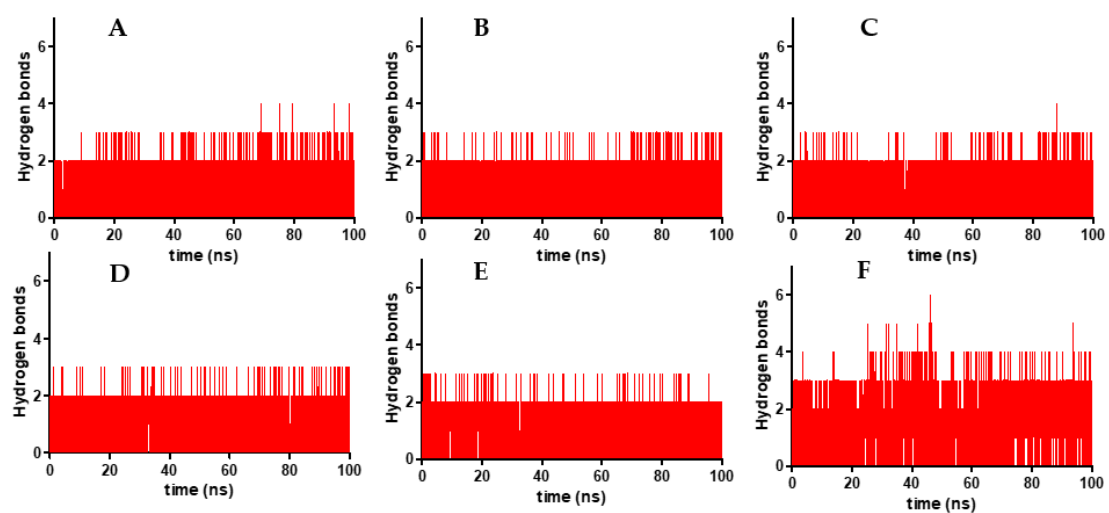

**Figure S42.** Number of hydrogen bonds encountered during the 100 ns simulation for SA01 (A); SA02 (B); SA03 (C); SA04 (D); SA06 (E); SA07 (F) complex with VEGFR2.

**Table S1.** Energetic decomposition for the amino-acids found within 5Å from the ligands (kcal/mol)

| PDB     | SA02  | SA03  | SA04  | SA05  | Sorafenib |
|---------|-------|-------|-------|-------|-----------|
| PRO812  | 0.00  | -0.35 | 0.00  | 0.00  | 0.00      |
| LEU813  | -0.31 | -0.77 | -0.24 | 0.00  | 0.00      |
| ASP814  | 0.14  | 11.91 | 0.06  | 0.16  | 0.00      |
| LYS838  | -0.22 | 0.00  | -0.08 | 0.00  | -0.01     |
| LEU840  | -1.00 | -0.94 | -1.09 | -0.86 | -1.24     |
| GLY841  | -0.26 | -0.28 | -0.20 | -0.26 | 0.00      |
| VAL848  | -0.92 | -0.89 | -0.75 | -0.82 | -0.81     |
| GLU850  | 0.00  | 0.00  | -0.07 | 0.00  | 0.00      |
| ALA866  | -0.57 | -0.61 | -0.58 | -0.52 | -1.09     |
| VAL867  | 0.00  | -0.31 | 0.00  | -0.36 | -0.23     |
| LYS868  | -1.71 | -1.38 | -2.43 | -1.47 | 0.67      |
| GLU885  | -1.24 | -0.51 | -0.25 | -2.03 | -4.20     |
| ILE888  | -1.05 | -1.38 | -1.13 | -1.13 | -0.59     |
| LEU889  | -1.36 | -1.44 | -1.36 | -1.32 | -1.44     |
| ILE892  | -0.34 | -0.38 | -0.29 | -0.19 | -1.03     |
| VAL898  | 0.00  | -0.44 | -0.58 | 0.00  | -0.97     |
| VAL899  | -1.38 | -1.23 | -1.36 | -1.47 | -1.04     |
| VAL914  | -0.44 | -0.47 | -0.39 | -0.54 | -0.42     |
| VAL916  | -1.06 | -1.16 | -1.23 | -1.19 | -1.14     |
| GLU917  | -1.33 | -1.32 | -0.91 | -1.20 | -2.39     |
| PHE918  | -1.80 | -1.82 | -1.82 | -1.76 | -1.25     |
| CYS919  | -1.87 | -1.73 | -1.70 | -1.75 | -1.66     |
| LYS920  | -0.18 | 0.02  | -0.03 | -0.14 | -0.19     |
| PHE921  | -0.08 | -0.12 | -0.12 | -0.06 | -0.11     |
| GLY922  | -0.29 | -0.19 | -0.26 | -0.18 | -0.35     |
| ASN923  | 1.03  | 0.73  | 0.72  | 0.62  | -0.08     |
| LEU1019 | -0.47 | -0.16 | -0.50 | -0.62 | -0.71     |
| CYS1024 | -0.61 | -0.61 | -0.84 | 0.00  | -0.35     |
| ILE1025 | 0.60  | 0.87  | 0.79  | -0.08 | 0.78      |
| HIS1026 | 0.39  | 0.35  | 0.19  | -0.28 | -0.43     |
| ARG1027 | -0.34 | -1.51 | 0.20  | 0.39  | 0.00      |
| LEU1035 | -1.49 | -1.41 | -1.36 | -1.34 | -1.08     |
| ILE1044 | -0.48 | -0.33 | -0.39 | -0.45 | -0.51     |
| CYS1045 | -1.89 | -1.99 | -1.97 | -1.68 | -2.69     |
| ASP1046 | -0.31 | -0.74 | -0.56 | -0.51 | -2.11     |
| PHE1047 | -1.47 | -1.19 | -1.33 | -1.72 | -2.22     |
| ALA1050 | 0.00  | 0.04  | 0.00  | 0.00  | 0.00      |

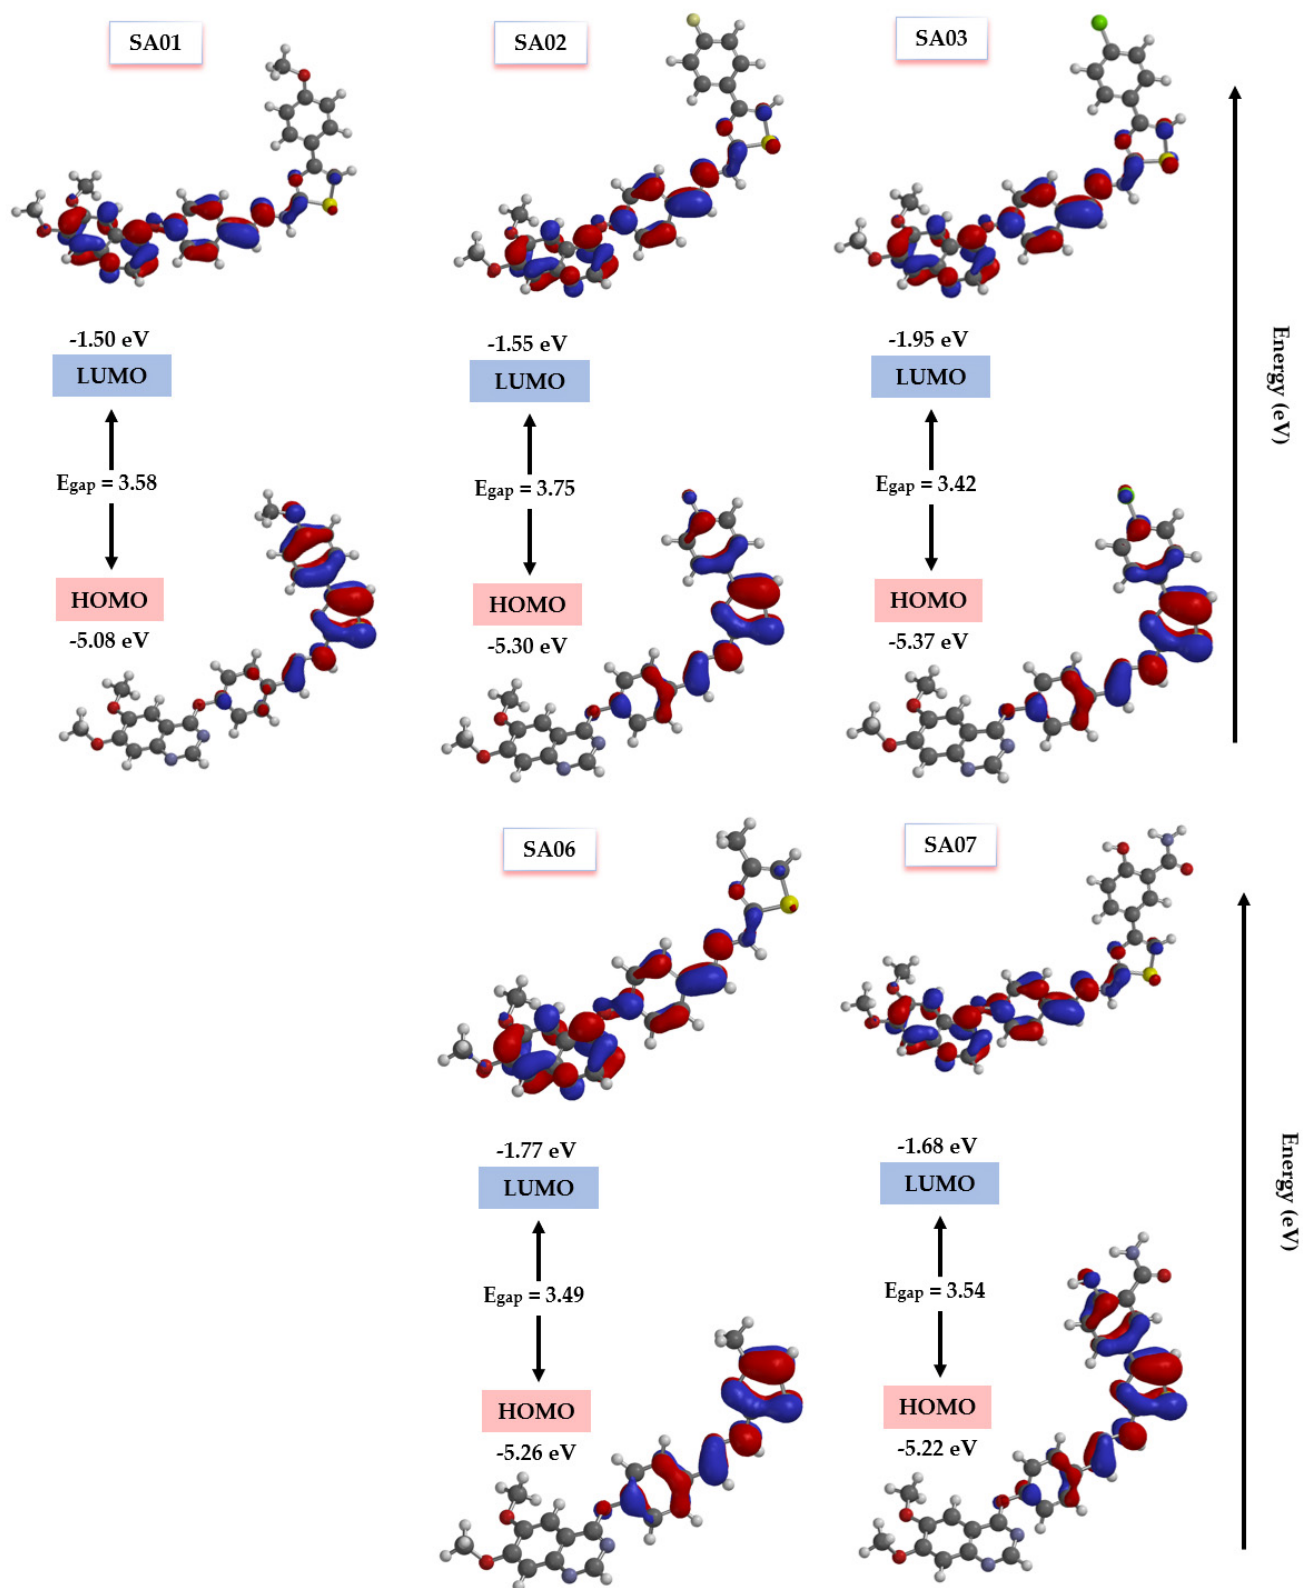

**Figure S43.** Graphical representation of molecular orbitals surface distribution and energy levels of HOMO and LUMO of the studied compounds SA01-SA03, SA06-SA07 at the B3LYB/6-311G++(d,p) level;

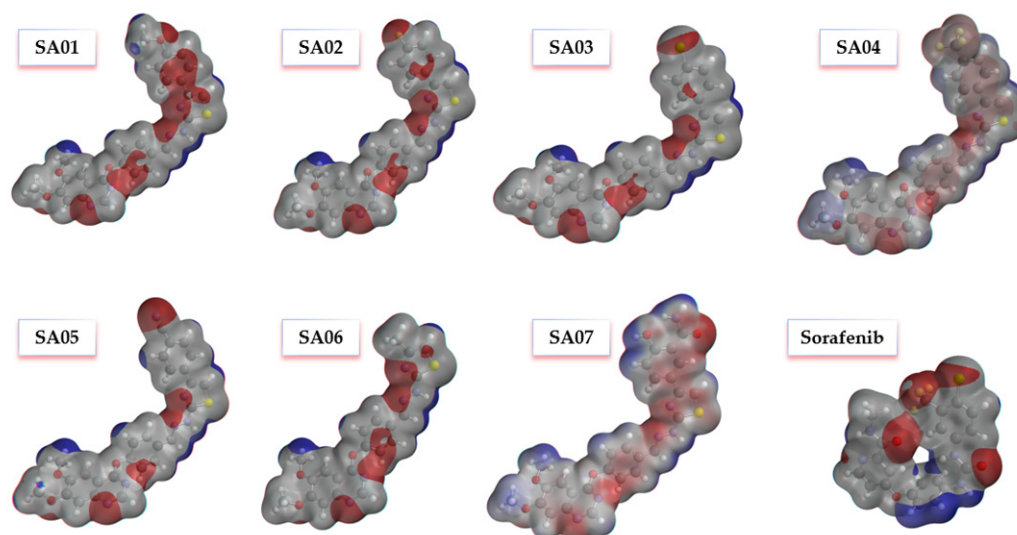

**Table S2.** *In silico* ADME profile and drug-likeness of the SA01-SA07 series & Sorafenib generated by SwissADME

| Drug-likeness       |   |   |   |   |   |   |   |   |
|---------------------|---|---|---|---|---|---|---|---|
| Lipinski Violations | 1 | 1 | 1 | 1 | 1 | 0 | 2 | 0 |
| Veber Violations    | 0 | 0 | 0 | 0 | 1 | 0 | 1 | 0 |

<sup>1</sup>Topological polar surface area, <sup>2</sup>Log S scale (insoluble < -10 < poorly < -6 < moderately < -4 soluble < -2 < very < 0 < highly); <sup>3</sup> gastrointestinal; <sup>4</sup> blood-brain barriers; <sup>5</sup> p-glycoprotein

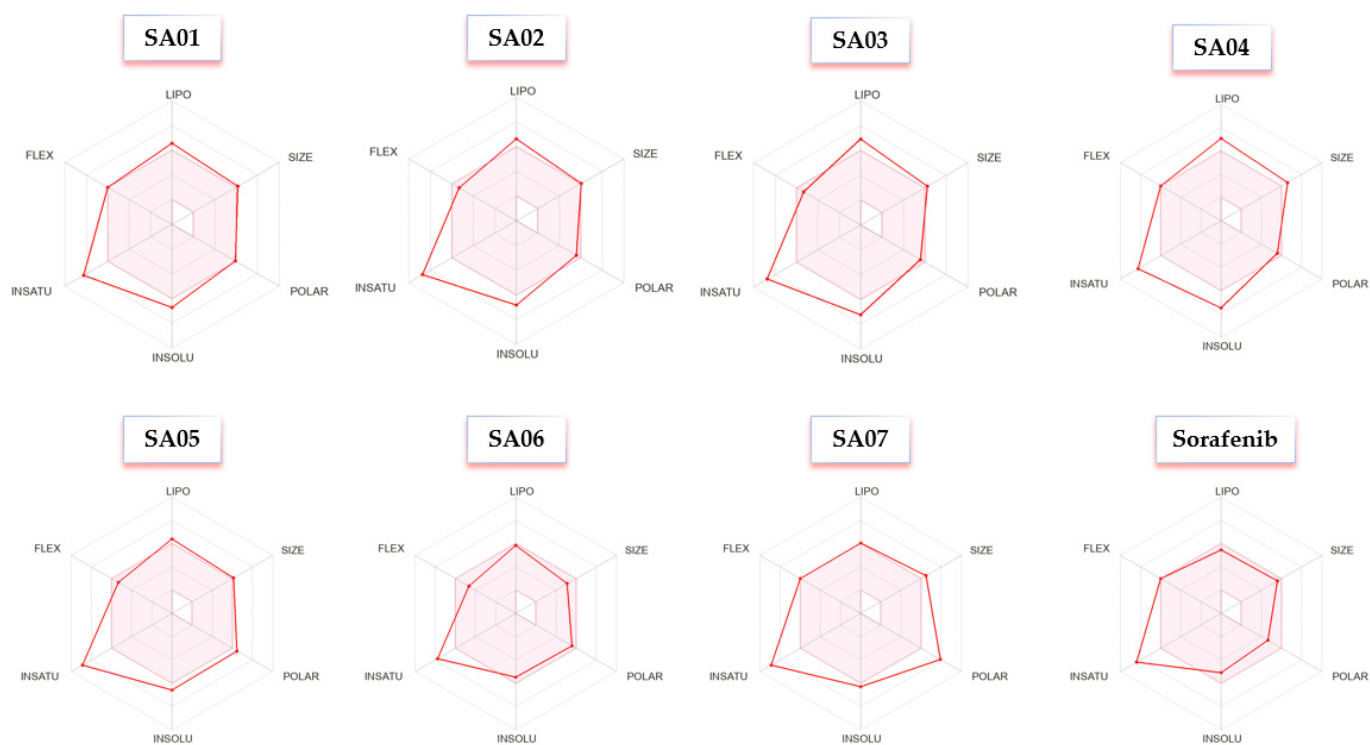

**Figure S45.** The bioavailability radar for the SA01-SA07 series & Sorafenib generated by Swis-sADME (The red zone represents the suitable range for the parameters for oral absorption); LIPO (lipophilicity,  $-7 < \text{XLOGP3} < +5.0$ ); SIZE (Molecular Weight g/mol,  $150 < \text{SIZE} < 500$ ); POLAR (Polarity,  $20 \text{ \AA}^2 < \text{POLAR} < 130 \text{ \AA}^2$ ); INSOLU (insolubility;  $-6 < \text{Log S (ESOL)} < 0$ ); INSATU (Insaturation;  $0.25 < \text{Fraction Csp}^3 < 1$ ); FLEX (Flexibility,  $0 < \text{Num. of rotatable bonds} < 9$ ).
